# Supplementary material for: Atezolizumab and nab-Paclitaxel in Advanced Triple-Negative Breast Cancer: Biomarker Evaluation of the IMpassion130 Study
Source: PubMed Central journal article supplement — J Natl Cancer Inst. 2021 Feb 1;113(8):1005–16. doi: 10.1093/jnci/djab004 (PMC8328980; doi:10.1093/jnci/djab004), 2021-02-01

## SUPPLEMENTARY MATERIALS

Emens LA, Molinero L, Loi S, et al. Atezolizumab and *nab*-Paclitaxel in Advanced Triple-Negative Breast Cancer: Biomarker Evaluation of the IMpassion130 Study

| <b>Contents</b>                                                                                                        | <b>Page</b> |
|------------------------------------------------------------------------------------------------------------------------|-------------|
| <b>Supplementary methods</b>                                                                                           | 2-3         |
| <b>Supplementary Table 1.</b> Comparison of baseline characteristics in BEPs                                           | 4           |
| <b>Supplementary Table 2.</b> PD-L1 IC status by baseline characteristics                                              | 5           |
| <b>Supplementary Table 3.</b> PD-L1 IC status in matched paired samples collected at the same time                     | 6           |
| <b>Supplementary Table 4.</b> PD-L1 IC status in matched primary:metastasis paired samples collected on different days | 6           |
| <b>Supplementary Figure 1.</b> Study flowchart                                                                         | 7           |
| <b>Supplementary Figure 2.</b> Timing of sample collection                                                             | 8           |
| <b>Supplementary Figure 3.</b> Clinical validation of BEP vs ITT population                                            | 9           |

## **Supplementary methods**

### **Further detail on PD-L1 evaluation**

Five pathologists from HistoGeneX who were trained by Roche Tissue Diagnostics/Ventana participated in scoring samples from the IMpassion130 study. HistoGeneX was required to be College of American Pathologists (CAP)/ Clinical Laboratory Improvement Amendments (CLIA) certified, among other standard operating procedural requirements. All pathologists were required to be board-certified anatomic pathologists (or equivalent), to undergo training and pass a proficiency test with a score of 85% or more at the PD-L1 IC 1% and IC 5% cutoffs. Further specifics on the training and validation can be found in the VENTANA PD-L1 (SP142) Assay package insert ([https://www.accessdata.fda.gov/cdrh\\_docs/pdf16/p160002s009c.pdf](https://www.accessdata.fda.gov/cdrh_docs/pdf16/p160002s009c.pdf)).

### **Further detail on CD8 evaluation: CD8 immunohistochemistry and quantification**

Stained slides were scanned using the Panoramic SCAN (3DHISTECH, Budapest, Hungary) to obtain whole-slide images. A 20x Plan Apo objective (0.80 NA) and Hitachi (HV-F22CL) 3CCD progressive scan color camera with a resulting image resolution of 0.23  $\mu\text{m}$  / pixel were used. JPEG image encoding with quality factor 80 and an interpolated focus distance of 15 with stitching in the scan options were chosen. Scanned images were examined using the Panoramic Viewer (3DHISTECH, Budapest, Hungary) to check for image quality and to confirm that the entire tissue section was captured. Automated image analysis on the whole-slide images was configured in Definiens™ Architect (version 2.1.1; Definiens AG, Munich, Germany). Manual delineation of a central tumor region (CnTumor) was done based on hematoxylin and eosin evaluation of a serial section by an anatomic pathologist. With the help of a self-written Definiens™ Action Library, at the interface between malignant and adjacent normal tissue, a 1000- $\mu\text{m}$  wide border (invasive margin region [IM]) centered around the perimeter was created. Tissue processing and imaging artifacts such as ruptured tissue, dirt or out-of-focus regions were excluded. To reduce analysis time, tiling was performed for CnTumor and IM, followed by systematic random sampling of minimum 35% of the tiles (at least 100 tiles need to be sampled). For both CnTumor and IM, the relative area of

Emens et al.

marker-positive cells is calculated in Definiens™ Tissue Studio® (version 3.5.1) at 6.6X.

**Supplementary Table 1.** Comparison of baseline characteristics in biomarker-evaluable populations

| Characteristic                                                                   | ITT<br>(n = 902) | CD8-BEP<br>(n = 720) | sTILs-BEP<br>(n = 892) | BRCA1/2-BEP<br>(n = 612) | PD-L1 TC-BEP<br>(n = 900) |
|----------------------------------------------------------------------------------|------------------|----------------------|------------------------|--------------------------|---------------------------|
| Disease status, n (%)                                                            |                  |                      |                        |                          |                           |
| Locally advanced unresectable                                                    | 88 (9.8)         | 77 (10.7)            | 88 (9.9)               | 60 (9.8)                 | 88 (9.8)                  |
| Metastatic                                                                       | 812 (90.0)       | 641 (89.0)           | 802 (90.0)             | 550 (90.0)               | 810 (90.0)                |
| N/A                                                                              | 2 (0.2)          | 2 (0.3)              | 2 (0.2)                | 2 (0.3)                  | 2 (0.2)                   |
| Age group, n (%)                                                                 |                  |                      |                        |                          |                           |
| <65 years                                                                        | 683 (75.7)       | 536 (74.4)           | 674 (75.6)             | 459 (75.0)               | 681 (75.7)                |
| ≥65 years                                                                        | 219 (24.3)       | 184 (25.6)           | 218 (24.4)             | 153 (25.0)               | 219 (24.3)                |
| ECOG PS, n (%)                                                                   |                  |                      |                        |                          |                           |
| 0                                                                                | 526 (58.3)       | 418 (58.1)           | 522 (58.5)             | 363 (59.3)               | 525 (58.3)                |
| ≥1                                                                               | 374 (41.5)       | 300 (41.7)           | 368 (41.3)             | 248 (40.5)               | 373 (41.4)                |
| N/A                                                                              | 2 (0.2)          | 2 (0.3)              | 2 (0.2)                | 1 (0.2)                  | 2 (0.2)                   |
| Presence of liver metastases, n (%)                                              |                  |                      |                        |                          |                           |
| Yes                                                                              | 238 (26.4)       | 181 (25.4)           | 234 (26.2)             | 145 (23.7)               | 238 (26.4)                |
| No                                                                               | 664 (73.6)       | 537 (74.6)           | 658 (73.8)             | 467 (76.3)               | 662 (73.6)                |
| Prior taxane treatment, n (%)                                                    |                  |                      |                        |                          |                           |
| Yes                                                                              | 464 (51.4)       | 347 (48.2)           | 457 (51.2)             | 306 (50.0)               | 462 (51.3)                |
| No                                                                               | 438 (48.6)       | 373 (51.8)           | 435 (48.8)             | 306 (50.0)               | 438 (48.7)                |
| Tumor PD-L1 status, n (%)                                                        |                  |                      |                        |                          |                           |
| IC0                                                                              | 533 (59.1)       | 317 (44.0)           | 526 (59.0)             | 310 (50.7)               | 532 (59.1)                |
| IC1/2/3                                                                          | 369 (40.9)       | 403 (56.0)           | 366 (41.0)             | 302 (49.3)               | 368 (40.9)                |
| Race, n (%)                                                                      |                  |                      |                        |                          |                           |
| American Indian or Alaska Native                                                 | 40 (4.4)         | 32 (4.4)             | 40 (4.5)               | 29 (4.7)                 | 40 (4.4)                  |
| Asian                                                                            | 161 (17.8)       | 144 (20.0)           | 161 (18.0)             | 117 (19.1)               | 161 (17.9)                |
| Black or African American                                                        | 59 (6.5)         | 42 (5.8)             | 58 (6.5)               | 33 (5.4)                 | 59 (6.6)                  |
| Multiple                                                                         | 5 (0.6)          | 4 (0.6)              | 5 (0.6)                | 1 (0.2)                  | 5 (0.6)                   |
| Native Hawaiian/Pacific Islander                                                 | 1 (0.1)          | 1 (0.1)              | 1 (0.1)                | 1 (0.2)                  | 1 (0.1)                   |
| White                                                                            | 609 (67.5)       | 475 (66.0)           | 601 (67.4)             | 409 (66.8)               | 607 (67.4)                |
| Unknown/other                                                                    | 27 (3.0)         | 22 (3.1)             | 26 (2.9)               | 22 (3.6)                 | 27 (3.0)                  |
| Presence of brain metastases, n (%)                                              |                  |                      |                        |                          |                           |
| Yes                                                                              | 60 (6.7)         | 47 (6.5)             | 61 (6.8)               | 40 (6.5)                 | 61 (6.8)                  |
| No                                                                               | 841 (93.2)       | 673 (93.5)           | 831 (93.2)             | 572 (93.5)               | 839 (93.2)                |
| Nodal only disease, n (%)                                                        |                  |                      |                        |                          |                           |
| Yes                                                                              | 56 (6.2)         | 42 (5.8)             | 56 (6.3)               | 41 (6.7)                 | 56 (6.2)                  |
| No                                                                               | 843 (93.5)       | 676 (93.9)           | 833 (93.4)             | 569 (93.0)               | 841 (93.4)                |
| N/A                                                                              | 3 (0.3)          | 2 (0.3)              | 3 (0.3)                | 2 (0.3)                  | 3 (0.3)                   |
| Number of metastatic sites, n/n (%)                                              |                  |                      |                        |                          |                           |
| 0-3                                                                              | 673 (74.6)       | 535 (74.3)           | 666 (74.7)             | 450 (73.5)               | 671 (74.6)                |
| ≥4                                                                               | 226 (25.1)       | 183 (25.4)           | 223 (25.0)             | 160 (26.1)               | 226 (25.1)                |
| N/A                                                                              | 3 (0.3)          | 2 (0.3)              | 3 (0.3)                | 2 (0.3)                  | 3 (0.3)                   |
| Time from last surgery until diagnosis of metastatic/unresectable disease, n (%) |                  |                      |                        |                          |                           |
| <24 months                                                                       | 276 (30.6)       | 220 (30.6)           | 271 (30.4)             | 202 (33.0)               | 274 (30.4)                |
| ≥24 months                                                                       | 289 (32.0)       | 218 (30.3)           | 286 (32.1)             | 179 (29.2)               | 289 (32.1)                |
| N/A                                                                              | 337 (37.4)       | 282 (39.2)           | 335 (37.6)             | 231 (37.7)               | 337 (37.4)                |

BEP = biomarker-evaluable population; ECOG PS = Eastern Cooperative Oncology Group performance status; IC = tumor-infiltrating immune cells; ITT = intention to treat; N/A = not available; PD-L1 = programmed death-ligand 1; sTIL = stromal tumor-infiltrating lymphocyte. Summary statistics are based on the full population indicated in the header. If the baseline characteristic was not available for all patients, the total number of patients evaluable for this characteristic is presented.

**Supplementary Table 2.** Baseline characteristics by PD-L1 IC status

| Characteristic                                                                          | PD-L1 IC <1%<br>(n = 532) | PD-L1 ≥1%<br>(n = 368) | P value |
|-----------------------------------------------------------------------------------------|---------------------------|------------------------|---------|
| <b>Disease status, n (%)</b>                                                            |                           |                        | 0.02    |
| Locally advanced unresectable                                                           | 41 (7.7)                  | 47 (12.8)              |         |
| Metastatic                                                                              | 490 (92.1)                | 320 (87.0)             |         |
| N/A                                                                                     | 1 (0.2)                   | 1 (0.3)                |         |
| <b>Age group, n (%)</b>                                                                 |                           |                        | 0.63    |
| <65 years                                                                               | 399 (75.0)                | 282 (76.6)             |         |
| ≥65 years                                                                               | 133 (25.0)                | 86 (23.4)              |         |
| <b>ECOG PS, n (%)</b>                                                                   |                           |                        | 0.602   |
| 0                                                                                       | 307 (57.7)                | 218 (59.2)             |         |
| 1/2                                                                                     | 307 (57.7)                | 218 (59.2)             |         |
| N/A                                                                                     | 2 (0.4)                   | 0                      |         |
| <b>Presence of liver metastases, n (%)</b>                                              |                           |                        | 0.034   |
| Yes                                                                                     | 155 (29.1)                | 83 (22.6)              |         |
| No                                                                                      | 377 (70.9)                | 285 (77.4)             |         |
| <b>Prior taxane treatment, n (%)</b>                                                    |                           |                        | 0.725   |
| Yes                                                                                     | 192 (36.1)                | 270 (73.4)             |         |
| No                                                                                      | 176 (33.1)                | 262 (71.2)             |         |
| <b>Race, n (%)</b>                                                                      |                           |                        | 0.811   |
| Asian                                                                                   | 95 (17.9)                 | 66 (17.9)              |         |
| Black or African American                                                               | 36 (6.8)                  | 23 (6.3)               |         |
| White                                                                                   | 356 (66.9)                | 251 (68.2)             |         |
| Unknown/other                                                                           | 47 (8.8)                  | 26 (7.1)               |         |
| <b>Presence of brain metastases, n (%)</b>                                              |                           |                        | 0.88    |
| Yes                                                                                     | 35 (6.6)                  | 26 (7.1)               |         |
| No                                                                                      | 497 (93.4)                | 342 (92.9)             |         |
| <b>Nodal only disease, n (%)</b>                                                        |                           |                        | 0.053   |
| Yes                                                                                     | 25 (4.7)                  | 31 (8.4)               |         |
| No                                                                                      | 505 (94.9)                | 336 (91.3)             |         |
| N/A                                                                                     | 2 (0.4)                   | 1 (0.3)                |         |
| <b>Number of metastatic sites, n (%)</b>                                                |                           |                        | 0.077   |
| 0-3                                                                                     | 383 (72.0)                | 288 (78.3)             |         |
| ≥4                                                                                      | 147 (27.6)                | 79 (21.5)              |         |
| N/A                                                                                     | 2 (0.4)                   | 1 (0.3)                |         |
| <b>Time from last surgery until diagnosis of metastatic/unresectable disease, n (%)</b> |                           |                        | 0.001   |
| <24 months                                                                              | 136 (25.6)                | 138 (37.5)             |         |
| ≥24 months                                                                              | 179 (33.6)                | 110 (29.9)             |         |
| N/A                                                                                     | 217 (40.8)                | 120 (32.6)             |         |

ECOG PS = Eastern Cooperative Oncology Group performance status; IC = tumor-infiltrating immune cells; N/A = not available; PD-L1 = programmed death-ligand 1.

Summary statistics are based on the full population indicated in the header. If the baseline characteristic was not available for all patients, the total number of patients evaluable for this characteristic is presented.

**Supplementary Table 3.** PD-L1 IC status in matched paired samples collected at the same time

| PD-L1 IC status    | Matched paired samples, n (%) |           |
|--------------------|-------------------------------|-----------|
|                    | Unchanged (IC <1%)            | 33 (48.5) |
| Unchanged (IC ≥1%) | 30 (44.1)                     |           |
| Changed            | 5 (7.4)                       |           |
| Total              | 68 (100.0)                    |           |

IC = tumor-infiltrating immune cell; PD-L1 = programmed death-ligand 1.

PD-L1 IC status agreement in synchronous samples: 92.6%.

Primary:metastases: 3 pairs; primary:primary: 50 pairs; metastases:metastases: 15 pairs.

**Supplementary Table 4.** PD-L1 IC status in matched primary:metastasis paired samples collected on different days

| PD-L1 status  |               | Metastases |           | Total      |
|---------------|---------------|------------|-----------|------------|
|               |               | IC <1%     | IC ≥1%    |            |
| Primary tumor | IC <1%, n (%) | 16 (43.2)  | 7 (18.9)  | 23 (62.2)  |
|               | IC ≥1%, n (%) | 10 (27.0)  | 4 (10.8)  | 14 (37.8)  |
|               | Total, n (%)  | 26 (70.0)  | 11 (30.0) | 37 (100.0) |

IC = tumor-infiltrating immune cell; PD-L1 = programmed death-ligand 1.

PD-L1 IC status agreement in asynchronous primary:metastases pairs: 54.1%.

**Supplementary Figure 1.** Study flowchart. BEPs include patients with evaluable tumor samples for the given biomarker; the main reasons for lack of biomarker-evaluable samples were exhaustion of slides or blocks and technical artifacts. <sup>a</sup> For additional details on screening ineligibility, treatment assignment, study and treatment discontinuation, death, and loss to follow-up, please see Schmid P, et al. *N Engl J Med.* 2018;379(22):2108-2121 and Schmid P, et al. *Lancet Oncol.* 2020;21(1):44-59. A = atezolizumab; BEP = biomarker-evaluable population; IC = tumor-infiltrating immune cells; ITT = intention to treat; nP = nab-paclitaxel; P = placebo; PD-L1 = programmed death-ligand 1; sTIL = stromal tumor-infiltrating lymphocyte; TC = tumor cells.

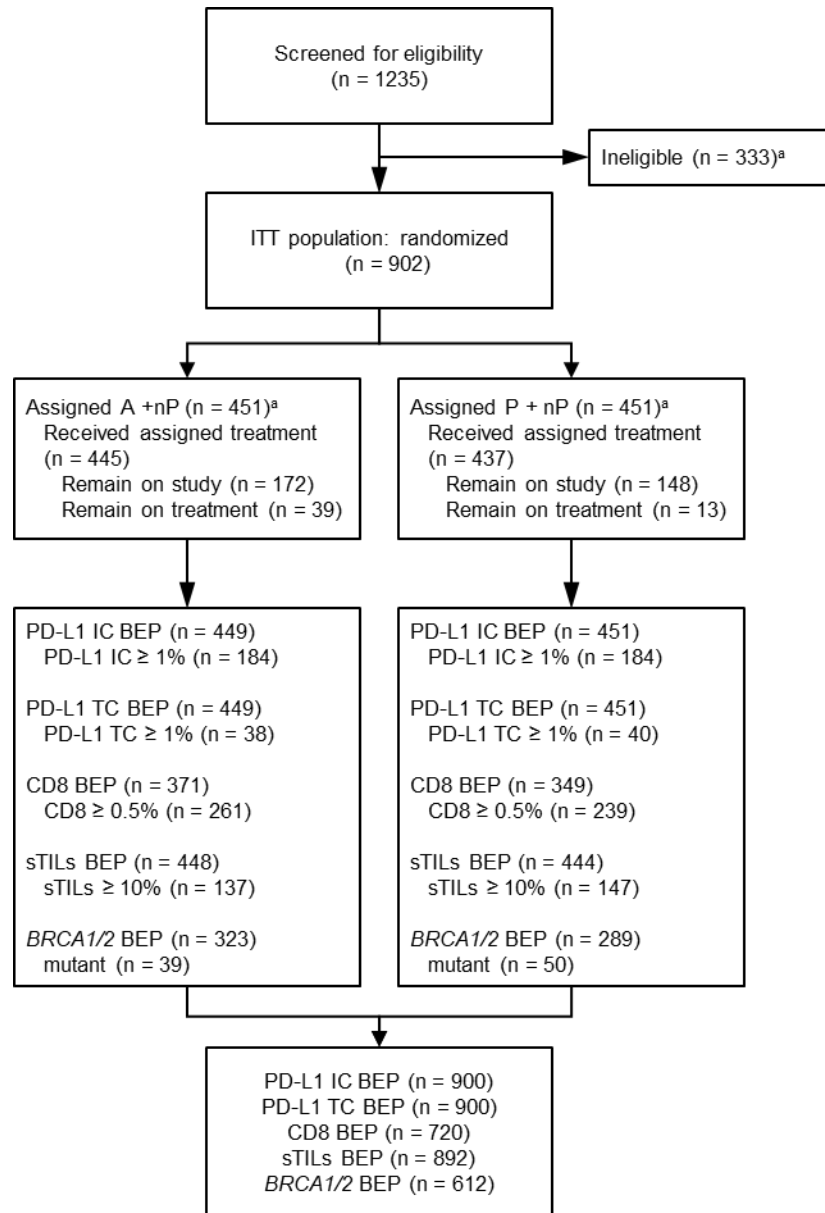

**Supplementary Figure 2.** Timing of sample collection. Time from collection to randomization is plotted in days.

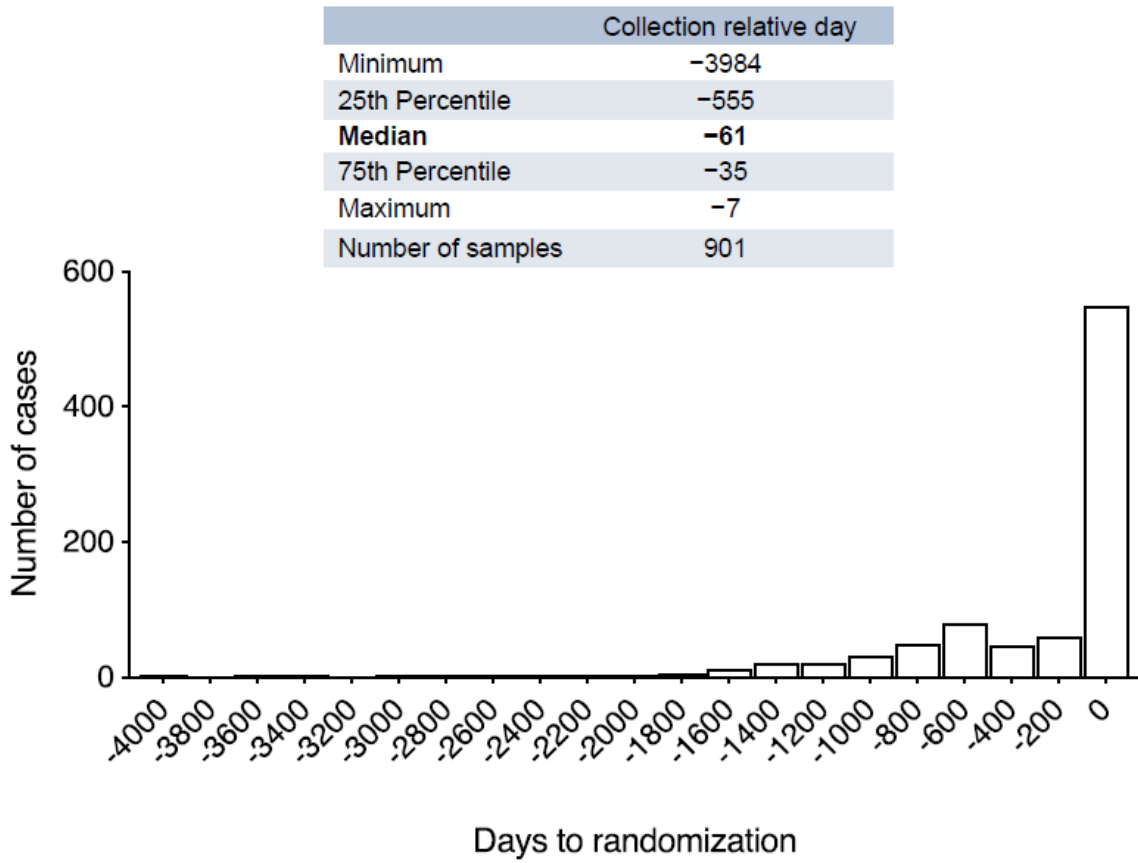



**Supplementary Figure 3.** Clinical validation of BEP vs intention-to-treat population (All). Kaplan-Meier plots for PFS and OS are shown for the indicated BEPs. A = atezolizumab; BEP = biomarker-evaluable population; nP = nab-paclitaxel; OS = overall survival; P = placebo; PFS = progression-free survival; TIL = tumor-infiltrating lymphocyte.

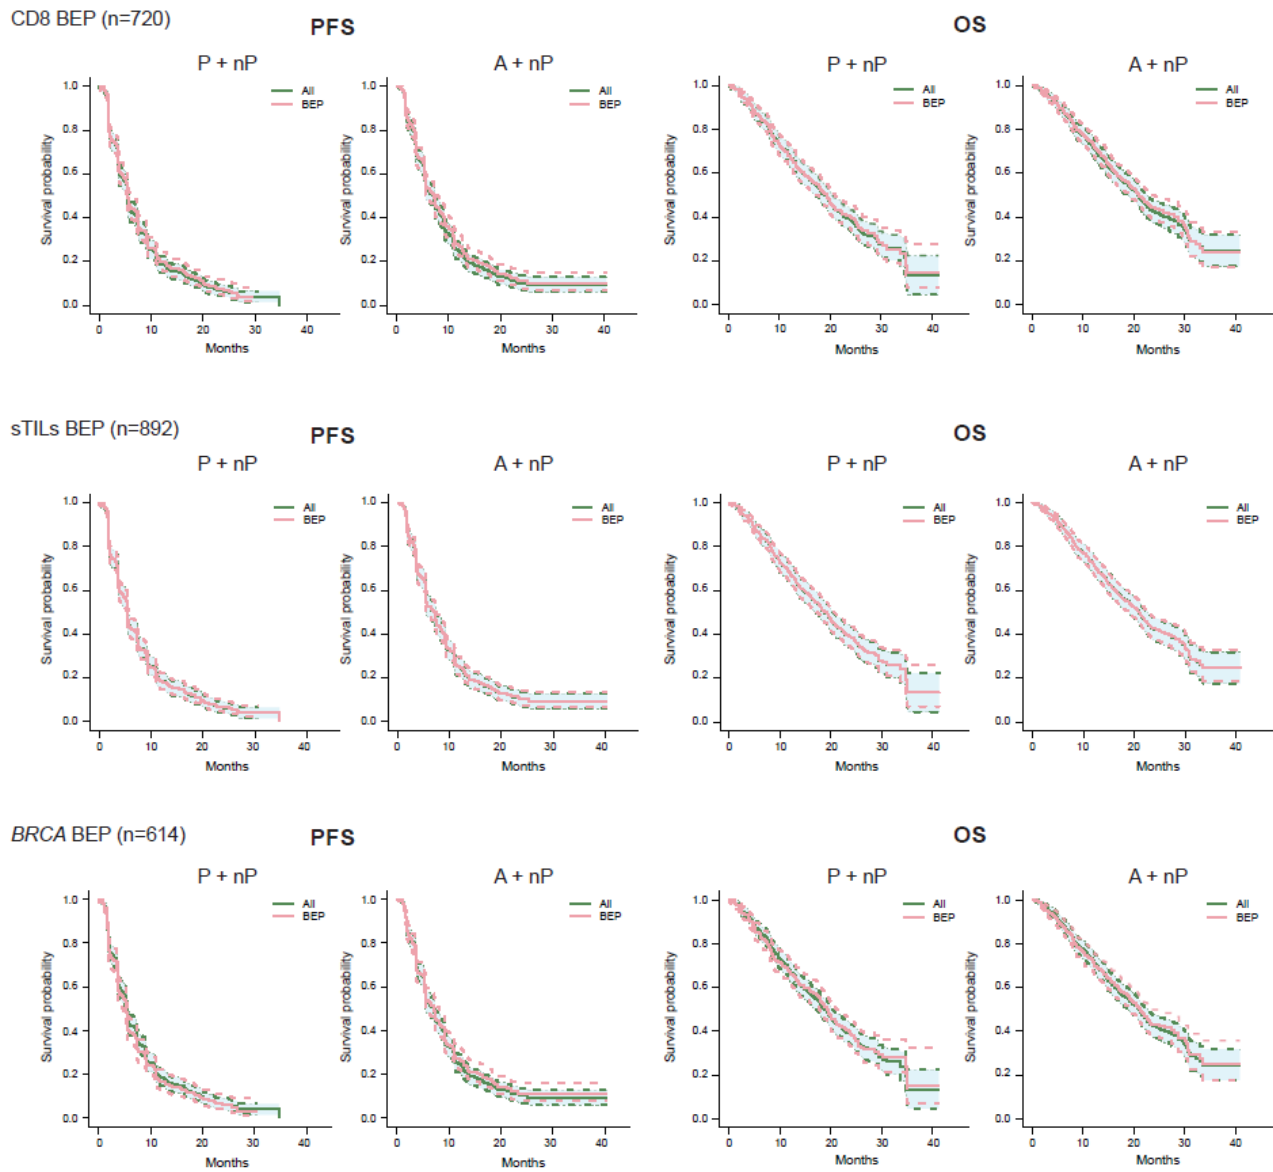

Supplement: djab004_supplementary_data.pdf [file djab004_supplementary_data.pdf]
